# Supplementary material for: Perspectives on Genetic Research: Results From a Survey of Navajo Community Members
Source: Front Genet. 2021 Dec 2;12:734529. doi: 10.3389/fgene.2021.734529 (PMC8675633; doi:10.3389/fgene.2021.734529)
Supplement: Supplementary file 2 [file DataSheet2.xlsx]

## Sheet: Supplementary Table 1
Reside
	I PRIMARILY LIVE ON THE NAVAJO NATION	I PRIMARILY LIVE OFF OF THE NAVAJO NATION	TRANSITORY BOTH ON AND OFF NAVAJO NATION	NONE OF THE ABOVE	TOTAL
Counts	521	102	61	6	690
Percentage	0.755072	0.147826	0.0884058	0.00869565
Age
	18-30	31-45	46-60	61-75	76+	TOTAL
Counts	211	189	176	100	14	690
Percentage	0.305797	0.273913	0.255072	0.144928	0.0202899
Gender
	MAN	WOMAN	TWO SPIRIT/LGBTQ	OTHER	TOTAL
Counts	218	443	22	6	689
Percentage	0.316401	0.642961	0.0319303	0.00870827
Note: Those respondents who chose multiple answers were included in the "Other" category.
Education
	MIDDLE SCHOOL	SOME HIGH SCHOOL	HIGH SCHOOL DIPLOMA/GED	VOCATIONAL SCHOOL	SOME COLLEGE	BACHELOR'S DEGREE	MASTER'S DEGREE	PROFESSIONAL DEGREE (JD,RN,MD)	DOCTORATE DEGREE	TOTAL
Counts	4	13	125	22	282	113	96	9	23	687
Percentage	0.00582242	0.0189229	0.181951	0.0320233	0.41048	0.164483	0.139738	0.0131004	0.0334789
Beliefs
	TRADITIONAL	WESTERN	BOTH TRADITIONAL AND WESTERN	NONE/OTHER	TOTAL
Counts	319	167	96	104	686
Percentage	0.465015	0.24344	0.139942	0.151603
Agency
	WESTERN	CENTRAL	NORTHERN	EASTERN	FORT DEFIANCE	NOT SURE/NOT APPLICABLE	TOTAL
Counts	135	113	172	121	68	69	678
Percentage	0.199115	0.166667	0.253687	0.178466	0.100295	0.10177
Knowledge_moratorium
	YES	NO	DON'T KNOW	TOTAL
Counts	169	422	79	670
Percentage	0.252239	0.629851	0.11791
Research_process
	STRONGLY DISAGREE	SOMEWHAT DISAGREE	NEUTRAL/NO OPINION	SOMEWHAT AGREE	STRONGLY AGREE	TOTAL
Counts	70	59	164	236	158	687
Percentage	0.101892	0.0858806	0.238719	0.343523	0.229985
Knowledge_genetics
	STRONGLY DISAGREE	SOMEWHAT DISAGREE	NEUTRAL/NO OPINION	SOMEWHAT AGREE	STRONGLY AGREE	TOTAL
Counts	74	98	277	200	35	684
Percentage	0.108187	0.143275	0.404971	0.292398	0.0511696
Spiritual_beliefs
	STRONGLY DISAGREE	SOMEWHAT DISAGREE	NEUTRAL/NO OPINION	SOMEWHAT AGREE	STRONGLY AGREE	TOTAL
Counts	49	53	152	191	238	683
Percentage	0.0717423	0.0775988	0.222548	0.279649	0.348463
Participation
	STRONGLY DISAGREE	SOMEWHAT DISAGREE	NEUTRAL/NO OPINION	SOMEWHAT AGREE	STRONGLY AGREE	TOTAL
Counts	127	108	262	93	92	682
Percentage	0.186217	0.158358	0.384164	0.136364	0.134897
Donation
	STRONGLY DISAGREE	SOMEWHAT DISAGREE	NEUTRAL/NO OPINION	SOMEWHAT AGREE	STRONGLY AGREE	TOTAL
Counts	127	88	241	99	124	679
Percentage	0.18704	0.129602	0.354934	0.145803	0.182622
Discussions
	NO OPINION	NO	A LITTLE BIT	YES	TOTAL
Counts	14	465	145	65	689
Percentage	0.0203193	0.674891	0.21045	0.0943396
Havasupai
	NO OPINION	NO	A LITTLE BIT	YES	TOTAL
Counts	17	485	59	128	689
Percentage	0.0246734	0.703919	0.0856313	0.185776
Positive
	NO OPINION	NO	A LITTLE BIT	YES	TOTAL
Counts	48	292	183	165	688
Percentage	0.0697674	0.424419	0.265988	0.239826
Negative
	NO OPINION	NO	A LITTLE BIT	YES	TOTAL
Counts	60	295	146	187	688
Percentage	0.0872093	0.428779	0.212209	0.271802
Researchers_background
	NO OPINION	VERY UNLIKELY	SOMEWHAT UNLIKELY	POSSIBLY	SOMEWHAT LIKELY	VERY LIKELY	TOTAL
Counts	68	190	79	171	88	93	689
Percentage	0.0986938	0.275762	0.114659	0.248186	0.127721	0.134978
Community_involvement
	NO OPINION	VERY UNLIKELY	SOMEWHAT UNLIKELY	POSSIBLY	SOMEWHAT LIKELY	VERY LIKELY	TOTAL
Counts	71	165	93	163	109	86	687
Percentage	0.103348	0.240175	0.135371	0.237263	0.158661	0.125182
Leader_review
	NO OPINION	VERY UNLIKELY	SOMEWHAT UNLIKELY	POSSIBLY	SOMEWHAT LIKELY	VERY LIKELY	TOTAL
Counts	73	169	86	167	102	90	687
Percentage	0.106259	0.245997	0.125182	0.243086	0.148472	0.131004
Disease_affect
	NO OPINION	VERY UNLIKELY	SOMEWHAT UNLIKELY	POSSIBLY	SOMEWHAT LIKELY	VERY LIKELY	TOTAL
Counts	65	122	73	163	111	153	687
Percentage	0.0946143	0.177584	0.106259	0.237263	0.161572	0.222707
Data_sharing
	NO OPINION	VERY UNLIKELY	SOMEWHAT UNLIKELY	POSSIBLY	SOMEWHAT LIKELY	VERY LIKELY	TOTAL
Counts	64	186	81	162	103	90	686
Percentage	0.0932945	0.271137	0.118076	0.236152	0.150146	0.131195
Trust
	NO OPINION	NOT AT ALL IMPORTANT	SLIGHTLY IMPORTANT	IMPORTANT	FAIRLY IMPORTANT	VERY IMPORTANT	TOTAL
Counts	63	29	42	123	47	385	689
Percentage	0.0914369	0.04209	0.0609579	0.17852	0.0682148	0.558781
Transparency
	NO OPINION	NOT AT ALL IMPORTANT	SLIGHTLY IMPORTANT	IMPORTANT	FAIRLY IMPORTANT	VERY IMPORTANT	TOTAL
Counts	71	23	38	124	65	368	689
Percentage	0.103048	0.0333817	0.0551524	0.179971	0.0943396	0.534107
Ethics
	NO OPINION	NOT AT ALL IMPORTANT	SLIGHTLY IMPORTANT	IMPORTANT	FAIRLY IMPORTANT	VERY IMPORTANT	TOTAL
Counts	67	20	40	112	50	396	685
Percentage	0.0978102	0.0291971	0.0583942	0.163504	0.0729927	0.578102
Privacy_confidentiality
	NO OPINION	NOT AT ALL IMPORTANT	SLIGHTLY IMPORTANT	IMPORTANT	FAIRLY IMPORTANT	VERY IMPORTANT	TOTAL
Counts	56	19	23	86	34	466	684
Percentage	0.0818713	0.0277778	0.0336257	0.125731	0.0497076	0.681287
Benefits
	NO OPINION	NOT AT ALL IMPORTANT	SLIGHTLY IMPORTANT	IMPORTANT	FAIRLY IMPORTANT	VERY IMPORTANT	TOTAL
Counts	68	20	26	127	68	379	688
Percentage	0.0988372	0.0290698	0.0377907	0.184593	0.0988372	0.550872
Cultural_beliefs
	NO OPINION	NOT AT ALL IMPORTANT	SLIGHTLY IMPORTANT	IMPORTANT	FAIRLY IMPORTANT	VERY IMPORTANT	TOTAL
Counts	79	29	35	142	69	331	685
Percentage	0.115328	0.0423358	0.0510949	0.207299	0.10073	0.483212
Equity
	NO OPINION	NOT AT ALL IMPORTANT	SLIGHTLY IMPORTANT	IMPORTANT	FAIRLY IMPORTANT	VERY IMPORTANT	TOTAL
Counts	91	20	43	135	80	319	688
Percentage	0.132267	0.0290698	0.0625	0.196221	0.116279	0.463663
Justice
	NO OPINION	NOT AT ALL IMPORTANT	SLIGHTLY IMPORTANT	IMPORTANT	FAIRLY IMPORTANT	VERY IMPORTANT	TOTAL
Counts	80	21	29	119	76	363	688
Percentage	0.116279	0.0305233	0.0421512	0.172965	0.110465	0.527616
Tribal_Oversight
	NO OPINION	NOT AT ALL IMPORTANT	SLIGHTLY IMPORTANT	IMPORTANT	FAIRLY IMPORTANT	VERY IMPORTANT	TOTAL
Counts	68	31	41	136	107	300	683
Percentage	0.0995608	0.045388	0.0600293	0.199122	0.156662	0.439239
Cultural_knowledge
	NO OPINION	NOT AT ALL IMPORTANT	SLIGHTLY IMPORTANT	IMPORTANT	FAIRLY IMPORTANT	VERY IMPORTANT	TOTAL
Counts	58	14	22	135	74	380	683
Percentage	0.0849195	0.0204978	0.0322108	0.197657	0.108346	0.556369
Benefit_to_Navajo
	NO OPINION	NOT AT ALL IMPORTANT	SLIGHTLY IMPORTANT	IMPORTANT	FAIRLY IMPORTANT	VERY IMPORTANT	TOTAL
Counts	62	13	18	128	78	386	685
Percentage	0.0905109	0.0189781	0.0262774	0.186861	0.113869	0.563504
Navajo_researchers
	NO OPINION	NOT AT ALL IMPORTANT	SLIGHTLY IMPORTANT	IMPORTANT	FAIRLY IMPORTANT	VERY IMPORTANT	TOTAL
Counts	90	40	69	135	99	251	684
Percentage	0.131579	0.0584795	0.100877	0.197368	0.144737	0.366959
Community_engagement
	NO OPINION	NOT AT ALL IMPORTANT	SLIGHTLY IMPORTANT	IMPORTANT	FAIRLY IMPORTANT	VERY IMPORTANT	TOTAL
Counts	65	20	33	150	82	332	682
Percentage	0.0953079	0.0293255	0.0483871	0.219941	0.120235	0.486804
Data_sharing_protections
	NO OPINION	NOT AT ALL IMPORTANT	SLIGHTLY IMPORTANT	IMPORTANT	FAIRLY IMPORTANT	VERY IMPORTANT	TOTAL
Counts	69	13	20	117	59	404	682
Percentage	0.101173	0.0190616	0.0293255	0.171554	0.0865103	0.592375
Lift_moratorium
	YES	NO	NOT SURE	TOTAL
Counts	251	122	316	689
Percentage	0.364296	0.177068	0.458636

## Sheet: Supplementary Table 2
	n = 690			Statistical Test Results
	Statistical Test Þ	Chi-square	Chi-square	Chi-square	Chi-square	Chi-square	Chi-square	Chi-square	Chi-square		Legend
Question type	Variables	Reside in relation to NN (on, off, both, none)	Age (grouped)	Gender (f, m, two-spirit, other)	Completed Educational-Level (grouped)	Belief (grouped)	Agency (grouped)	Knowledge of moratorium? (yes, no, don't know)	Lift moratorium? (yes, no, not sure)		Significant Chi-square test	Post hoc analysis inconclusive
	Mult-test alpha	0.00416666	0.0033333	0.00416666	0.00185185	0.00416666	0.00277777	0.0055555	0.0055555
Knowledge-based	Knowledge_moratorium	X-squared = 30.031, df = 6, p-value = 3.878e-05	X-squared = 33.277, df = 8, p-value = 5.49e-05	X-squared = 4.3681, df = 6, p-value = 0.627	X-squared = 115.67, df = 16, p-value < 2.2e-16	X-squared = 4.8105, df = 6, p-value = 0.5683	X-squared = 21.805, df = 10, p-value = 0.01613		X-squared = 42.355, df = 4, p-value = 1.408e-08
	Mult-test alpha	0.0025	0.002	0.0025	0.00111111	0.0025	0.002	0.0033333	0.0033333
Knowledge-based	Research_process	X-squared = 72.544, df = 12, p-value = 1.067e-1	X-squared = 49.405, df = 16, p-value = 2.85e-05	X-squared = 20.877, df = 12, p-value = 0.05221	X-squared = 134.99, df = 32, p-value = 1.31e-14	X-squared = 13.073, df = 12, p-value = 0.3638	X-squared = 24.873, df = 20, p-value = 0.2063	X-squared = 93.189, df = 8, p-value < 2.2e-16	X-squared = 34.898, df = 8, p-value = 2.79e-05
	Mult-test alpha	0.0025	0.002	0.0025	0.00111111	0.0025	0.002	0.0033333	0.0033333
Knowledge-based	Knowledge_genetics	X-squared = 19.295, df = 12, p-value = 0.08166	X-squared = 12.365, df = 16, p-value = 0.7185	X-squared = 20.952, df = 12, p-value = 0.05108	X-squared = 56.787, df = 32, p-value = 0.004457	X-squared = 12.406, df = 12, p-value = 0.4137	X-squared = 25.057, df = 20, p-value = 0.1993	X-squared = 33.564, df = 8, p-value = 4.871e-05	X-squared = 16.016, df = 8, p-value = 0.04216
	Mult-test alpha	0.0025	0.002	0.0025	0.00111111	0.0025	0.002	0.0033333	0.0033333
Belief-based	Spiritual_beliefs	X-squared = 17.767, df = 12, p-value = 0.123	X-squared = 27.381, df = 16, p-value = 0.03744	X-squared = 5.353, df = 12, p-value = 0.9451	X-squared = 38.963, df = 32, p-value = 0.1851	X-squared = 82.999, df = 12, p-value = 1.102e-12	X-squared = 30.606, df = 20, p-value = 0.0606	X-squared = 21.59, df = 8, p-value = 0.005734	X-squared = 15.323, df = 8, p-value = 0.05316
	Mult-test alpha	0.0025	0.002	0.0025	0.00111111	0.0025	0.002	0.0033333	0.0033333
Participation-based	Participation	X-squared = 24.841, df = 12, p-value = 0.0156	X-squared = 16.857, df = 16, p-value = 0.3949	X-squared = 23.864, df = 12, p-value = 0.02122	X-squared = 45.581, df = 32, p-value = 0.05654	X-squared = 22.854, df = 12, p-value = 0.02899	X-squared = 18.19, df = 20, p-value = 0.5749	X-squared = 11.516, df = 8, p-value = 0.1741	X-squared = 112.4, df = 8, p-value < 2.2e-16
	Mult-test alpha	0.0025	0.002	0.0025	0.00111111	0.0025	0.002	0.0033333	0.0033333
Participation-based	Donation	X-squared = 28.626, df = 12, p-value = 0.004476	X-squared = 18.168, df = 16, p-value = 0.3142	X-squared = 15.449, df = 12, p-value = 0.2178	X-squared = 47.393, df = 32, p-value = 0.03909	X-squared = 41.173, df = 12, p-value = 4.584e-05	X-squared = 14.029, df = 20, p-value = 0.829	X-squared = 12.575, df = 8, p-value = 0.1273	X-squared = 84.306, df = 8, p-value = 6.619e-15
	Mult-test alpha	0.0625	0.0025	0.0625	0.00138889	0.0625	0.00208333	0.00416666	0.00416666
Knowledge-based	Discussions	X-squared = 30.529, df = 9, p-value = 0.0003564	X-squared = 22.631, df = 12, p-value = 0.03102	X-squared = 10.813, df = 9, p-value = 0.2887	X-squared = 77.535, df = 24, p-value = 1.496e-07	X-squared = 20.404, df = 9, p-value = 0.01558	X-squared = 18.414, df = 15, p-value = 0.2415	X-squared = 257.36, df = 6, p-value < 2.2e-16	X-squared = 23.578, df = 6, p-value = 0.0006243
	Mult-test alpha	0.0625	0.0025	0.0625	0.00138889	0.0625	0.00208333	0.00416666	0.00416666
Knowledge-based	Havasupai	X-squared = 82.925, df = 9, p-value = 4.231e-14	X-squared = 32.14, df = 12, p-value = 0.001316	X-squared = 6.8814, df = 9, p-value = 0.6495	X-squared = 170.9, df = 24, p-value < 2.2e-16	X-squared = 12.351, df = 9, p-value = 0.1942	X-squared = 42.968, df = 15, p-value = 0.0001593	X-squared = 188.18, df = 6, p-value < 2.2e-16	X-squared = 10.633, df = 6, p-value = 0.1004
	Mult-test alpha	0.0625	0.0025	0.0625	0.00138889	0.0625	0.00208333	0.00416666	0.00416666
Knowledge-based	Positive	X-squared = 25.179, df = 9, p-value = 0.00278	X-squared = 16.256, df = 12, p-value = 0.1798	X-squared = 10.494, df = 9, p-value = 0.312	X-squared = 72.295, df = 24, p-value = 9.767e-07	X-squared = 6.064, df = 9, p-value = 0.7335	X-squared = 12.511, df = 15, p-value = 0.64	X-squared = 68.414, df = 6, p-value = 8.643e-13	X-squared = 52.371, df = 6, p-value = 1.57e-09
	Mult-test alpha	0.0625	0.0025	0.0625	0.00138889	0.0625	0.00208333	0.00416666	0.00416666
Knowledge-based	Negative	X-squared = 80.712, df = 9, p-value = 1.167e-13	X-squared = 29.956, df = 12, p-value = 0.002835	X-squared = 12.703, df = 9, p-value = 0.1765	X-squared = 128.01, df = 24, p-value = 3.558e-16	X-squared = 18.344, df = 9, p-value = 0.03139	X-squared = 19.877, df = 15, p-value = 0.1767	X-squared = 134.21, df = 6, p-value < 2.2e-16	X-squared = 35.117, df = 6, p-value = 4.091e-06
	Mult-test alpha	0.00208333	0.002	0.00208333	0.00092593	0.00208333	0.00138889	0.0027777	0.0027777
Participation-based	Researchers_background	X-squared = 23.314, df = 15, p-value = 0.07771	X-squared = 28.999, df = 20, p-value = 0.08777	X-squared = 11.127, df = 15, p-value = 0.7436	X-squared = 85.439, df = 40, p-value = 3.861e-05	X-squared = 18.208, df = 15, p-value = 0.2519	X-squared = 36.221, df = 25, p-value = 0.06831	X-squared = 19.153, df = 10, p-value = 0.03837	X-squared = 115.01, df = 10, p-value < 2.2e-16
	Mult-test alpha	0.00208333	0.002	0.00208333	0.00092593	0.00208333	0.00138889	0.0027777	0.0027777
Participation-based	Community_involvement	X-squared = 45.758, df = 15, p-value = 5.81e-05	X-squared = 30.289, df = 20, p-value = 0.0653	X-squared = 11.478, df = 15, p-value = 0.718	X-squared = 81.373, df = 40, p-value = 0.000121	X-squared = 21.54, df = 15, p-value = 0.1204	X-squared = 44.516, df = 25, p-value = 0.009489	X-squared = 30.002, df = 10, p-value = 0.0008561	X-squared = 141.28, df = 10, p-value < 2.2e-16
	Mult-test alpha	0.00208333	0.002	0.00208333	0.00092593	0.00208333	0.00138889	0.0027777	0.0027777
Participation-based	Leader_review	X-squared = 42.988, df = 15, p-value = 0.0001581	X-squared = 41.553, df = 20, p-value = 0.003161	X-squared = 8.6112, df = 15, p-value = 0.897	X-squared = 87.125, df = 40, p-value = 2.377e-05	X-squared = 17.524, df = 15, p-value = 0.2885	X-squared = 46.839, df = 25, p-value = 0.005122	X-squared = 35.095, df = 10, p-value = 0.0001203	X-squared = 118.32, df = 10, p-value < 2.2e-16
	Mult-test alpha	0.00208333	0.002	0.00208333	0.00092593	0.00208333	0.00138889	0.0027777	0.0027777
Participation-based	Disease_affect	X-squared = 43.358, df = 15, p-value = 0.0001385	X-squared = 35.633, df = 20, p-value = 0.01698	X-squared = 7.2868, df = 15, p-value = 0.9492	X-squared = 90.286, df = 40, p-value = 9.404e-06	X-squared = 23.055, df = 15, p-value = 0.08297	X-squared = 39.001, df = 25, p-value = 0.03683	X-squared = 32.895, df = 10, p-value = 0.0002836	X-squared = 116.73, df = 10, p-value < 2.2e-16
	Mult-test alpha	0.00208333	0.002	0.00208333	0.00092593	0.00208333	0.00138889	0.0027777	0.0027777
Participation-based	Data_sharing	X-squared = 21.965, df = 15, p-value = 0.1087	X-squared = 14.807, df = 20, p-value = 0.7874	X-squared = 7.971, df = 15, p-value = 0.9249	X-squared = 73.371, df = 40, p-value = 0.001008	X-squared = 30.707, df = 15, p-value = 0.009613	X-squared = 44.75, df = 25, p-value = 0.008929	X-squared = 30.383, df = 10, p-value = 0.0007415	X-squared = 115.73, df = 10, p-value < 2.2e-16
	Mult-test alpha	0.00416666	0.0033333	0.00416666	0.00185185	0.00416666	0.00277777	0.0055555	0.0055555
Opinion	Lift moratorium	X-squared = 12.826, df = 6, p-value = 0.04588	X-squared = 17.13, df = 8, p-value = 0.02878	X-squared = 7.7616, df = 6, p-value = 0.2561	X-squared = 7.7616, df = 6, p-value = 0.2561	X-squared = 5.8483, df = 6, p-value = 0.4404	X-squared = 11.313, df = 10, p-value = 0.3336	X-squared = 42.355, df = 4, p-value = 1.408e-08

## Sheet: Supplementary Table 3
Type	Count
Health and disease	548
Pharmacogenomics	420
Personalized medicine	418
Ancestry	410
Basic research	390
Population genetics	346
Migration	316
All research	216
No research	62
Other	17
